# Supplementary material
Source: PubMed Central journal article supplement (PMC1626620)
Supplement: plntcell_tpc.105.038323_1.pdf [file plntcell_tpc.105.038323_1.pdf]

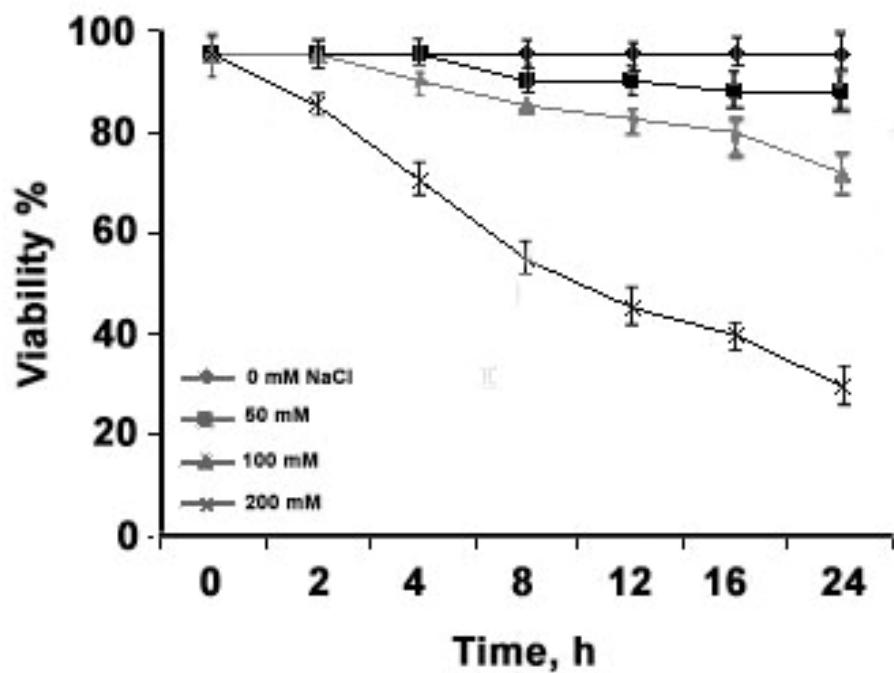

**Supplemental Figure 1:** Viability of grapevine cells grown in 0, 50, 100, and 200 mM NaCl for 24 h. Bars represent  $\pm$ SE of three replicates out of three independent experiments.
