# Supplementary material
Source: PubMed Central journal article supplement (PMC1626620)
Supplement: plntcell_tpc.105.038323_2.pdf [file plntcell_tpc.105.038323_2.pdf]

**A**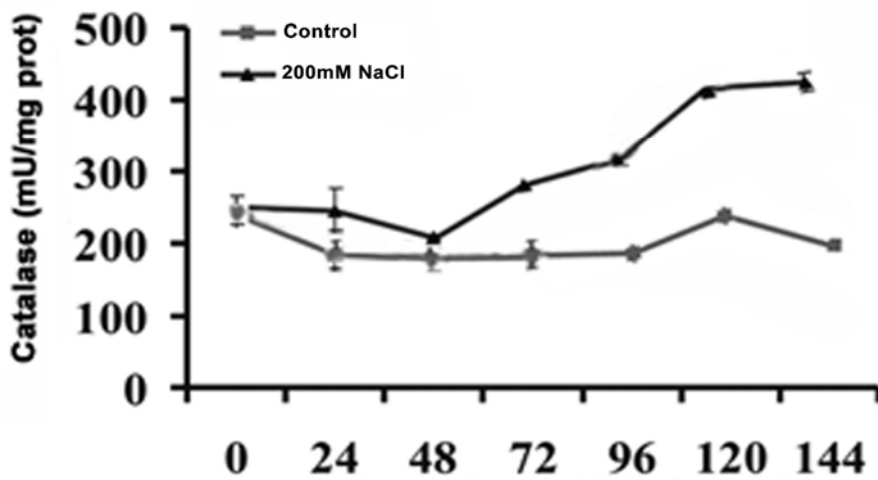**B**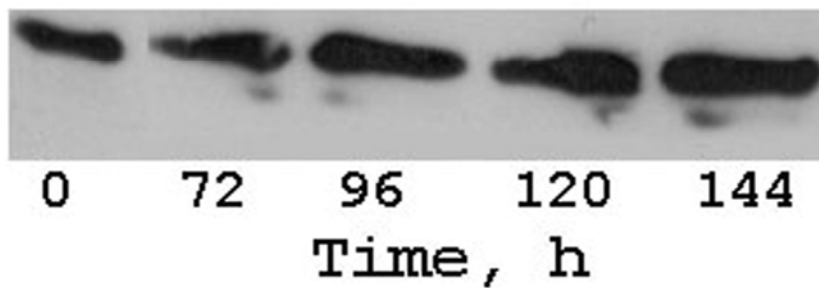

**Supplemental Figure 2:** Salinity induced the expression of catalase in grapevine leaf discs exposed to salt stress.

(A) *In vitro* catalase activity in grapevine leaf discs treated with 200 mM NaCl.

(B) Immunoreactive catalase protein in grapevine leaf discs treated with 200 mM NaCl.

Bars represent  $\pm$ SE of three replicates out of two independent experiments.
