# Supplementary material
Source: PubMed Central journal article supplement (PMC1626620)
Supplement: plntcell_tpc.105.038323_3.pdf [file plntcell_tpc.105.038323_3.pdf]

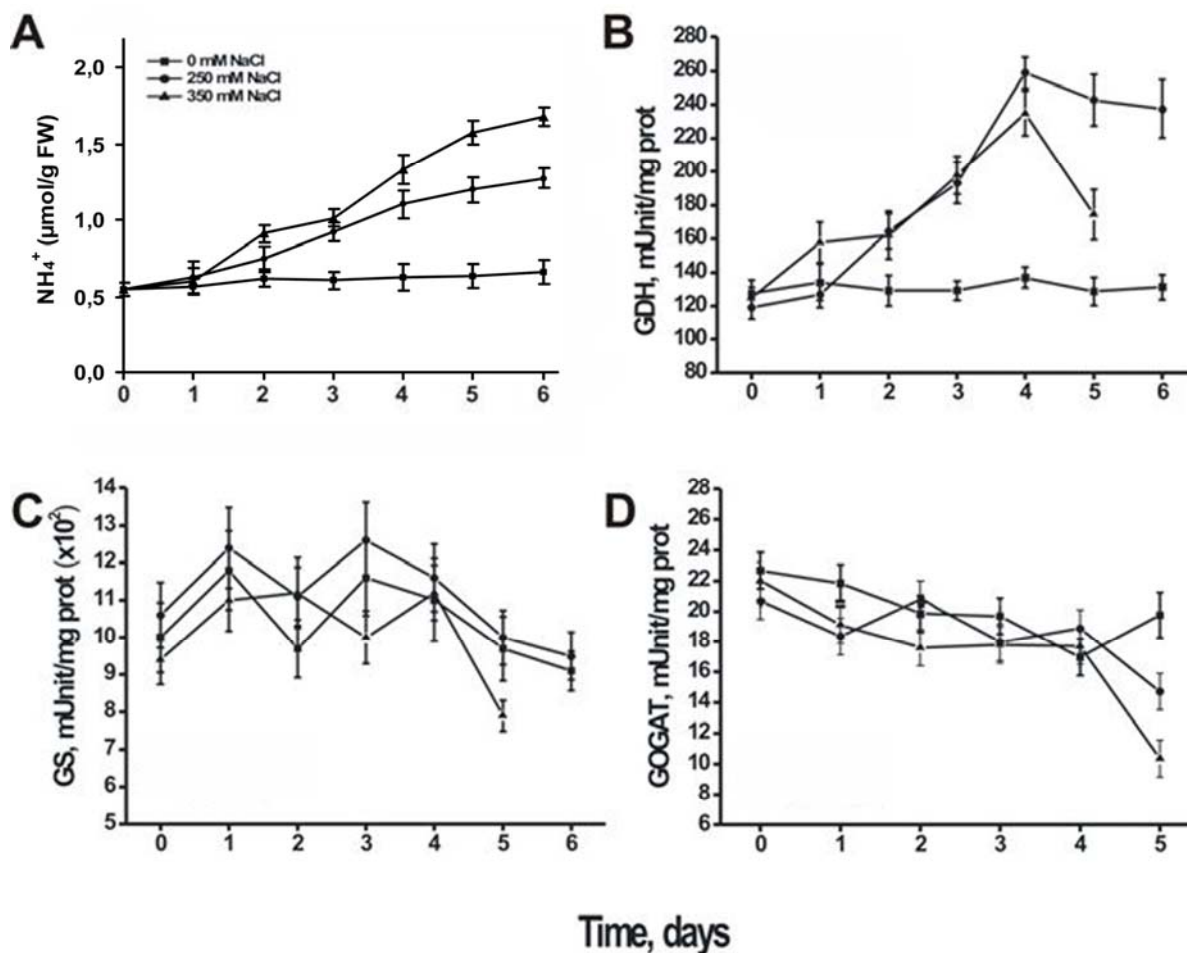

**Supplemental Figure 3:** Ammonium content and *in vitro* aminating and deaminating activities of GDH and *in vitro* specific activities of GS and GOGAT in tobacco (*Nicotiana tabacum* L. cv Xanthi) plants grown under salinity conditions.

(A) Endogenous free  $\text{NH}_4^+$  content in shoots of tobacco plants.

(B) *In vitro* aminating specific activity of GDH in shoots of tobacco plants.

(C) *In vitro* specific activities of GS in shoots of tobacco plants

(D) *In vitro* specific activities of GOGAT in shoots of tobacco plants.

Bars represent  $\pm$ SE of three replicates out of three independent experiments.
