# Supplementary material
Source: PubMed Central journal article supplement (PMC1626620)
Supplement: plntcell_tpc.105.038323_4.pdf [file plntcell_tpc.105.038323_4.pdf]

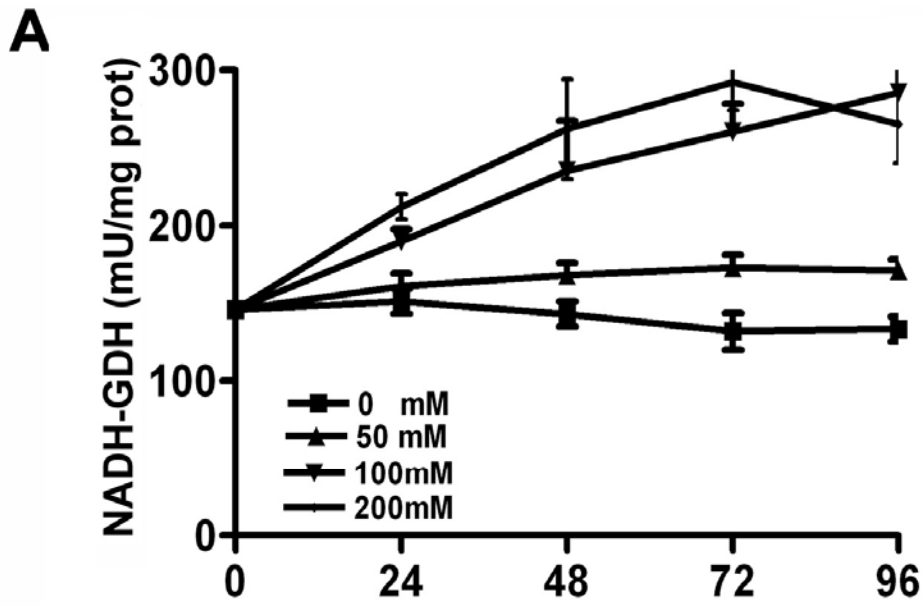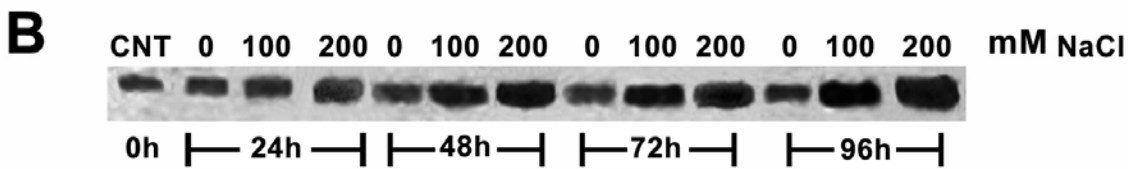

**Supplemental Figure 4:** Salinity induced the expression of GDH in BY-2 cells grown under salinity conditions.

(A) *In vitro* aminating specific activity of GDH in BY-2 cells.

(B) Immunoreactive GDH protein in BY-2 cells.

Bars represent  $\pm$ SE of three replicates out of three independent experiments.
