# Supplementary material
Source: PubMed Central journal article supplement (PMC1626620)
Supplement: plntcell_tpc.105.038323_5.pdf [file plntcell_tpc.105.038323_5.pdf]

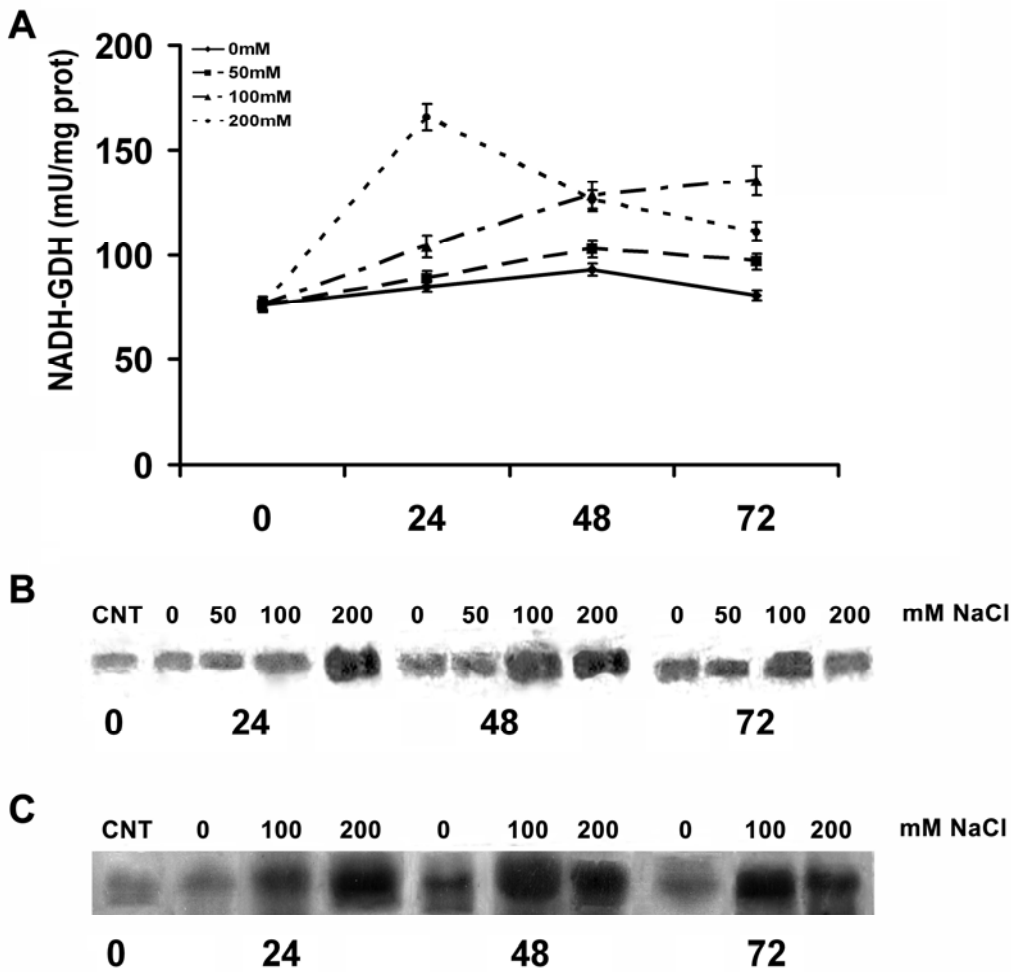

**Supplemental Figure 5:** Salinity-induced the expression of GDH in grapevine leaf discs.

(A) *In vitro* aminating GDH specific activity in leaf discs of *Vitis vinifera* L. cv Soutanina.

(B) Immunoreactive GDH protein.

(C) Abundance of *Vv gdh-NAD;A1* transcript encoding for the  $\alpha$ -subunit of GDH in leaf discs of *Vitis vinifera* L. cv Soutanina.

Leaf discs were treated with 0, 50, 100 and 200 mM NaCl for 72 h, as described in Materials and Methods. Bars represent  $\pm$ SE of three replicates out of two independent experiments.
