# Supplementary material
Source: PubMed Central journal article supplement (PMC1626620)
Supplement: plntcell_tpc.105.038323_6.pdf [file plntcell_tpc.105.038323_6.pdf]

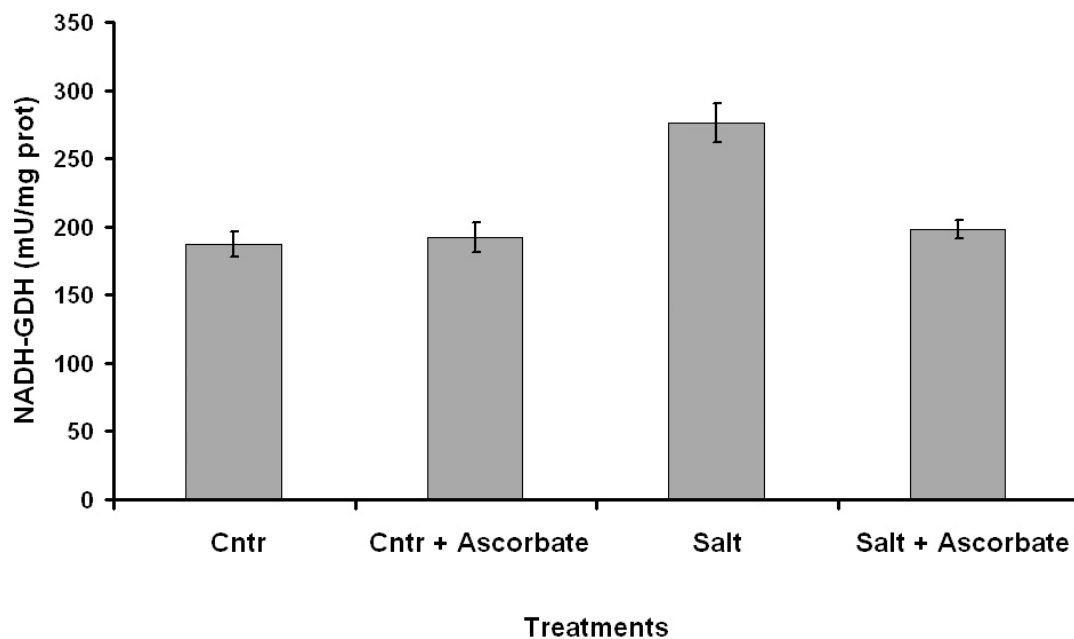

**Supplemental Figure 6:** Addition of ascorbate (10  $\mu$ M) prevents increase in *in vitro* aminating specific activity of GDH in grapevine cells exposed to salinity treatment (200 mM NaCl) for 24 h. Bars represent  $\pm$ SE of three replicates out of two independent experiments.
