# Supplementary material
Source: PubMed Central journal article supplement (PMC1626620)
Supplement: plntcell_tpc.105.038323_7.pdf [file plntcell_tpc.105.038323_7.pdf]

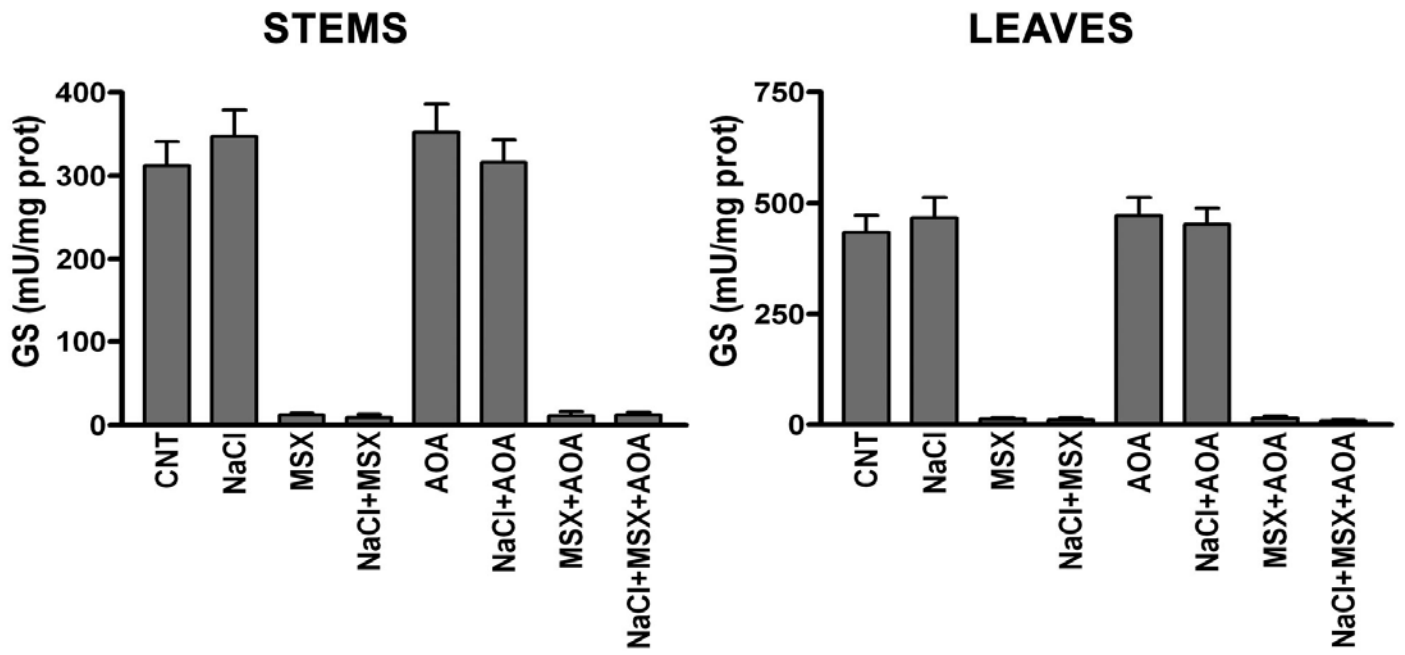

**Supplemental Figure 7:** *In vitro* specific activities of GS in stems and leaves of tobacco plants grown in the presence of MSX and/or AOA for 24h, respectively. Bars represent  $\pm$ SE of three replicates out of three independent experiments.
